# Supplementary material
Source: PubMed Central journal article supplement (PMC4505223)
Supplement: AAC.00925-15_zac008154268so1.pdf [file AAC.00925-15_zac008154268so1.pdf]

|    |                       |                                                                                    |     |
|----|-----------------------|------------------------------------------------------------------------------------|-----|
| 1  | <i>S. cerevisiae</i>  | MSATKSIVGEALEYVNI GLSHFLALPLAQRI--SLIIIIIPFIYNIWQLLYSLR-KDRPPLVFIWIPWVGS AVVYGMKPY | 77  |
| 2  | <i>C. albicans</i>    | ----MAIVETVID----GINYFLSLSVTQQI--SILLGVFPVYNLVWQYLYSLR-KDRAPLVFIWIPWFGSAASYGQQPY   | 69  |
| 3  | <i>A. fumigatus</i> A | -----MVPML-----WLTAYMAV--AVLTAILLNVVYQLFFRLWNRTPEPPMVFWVYLGSTISYGIDPY              | 58  |
| 4  | <i>A. fumigatus</i> B | MGLIAFILDGICKHCSTQST----WVLVIGIGLLSILAVSVI INVLQQLLFKN--PHEPPVVFHWFPFIGSTISYGIDPY  | 73  |
| 5  |                       | : : : ..: *:: * :: ..****:*:*:*:** ** .**                                          |     |
| 6  |                       |                                                                                    |     |
| 7  | <i>S. cerevisiae</i>  | EFFEECQKKYGDIFSFVLLGRVMTVYLGPKGHEFVFN AKLADVSAEAA YAHLTTPVFGKGVYDCPN SRLMEQKKFVKGA | 157 |
| 8  | <i>C. albicans</i>    | EFFESCRQKYGDVFSFMLLGKIMTVYLGPKGHEFVFN AKLSDVSAEDAYKHLTTPVFGKGVYDCPN SRLMEQKKFAKFA  | 149 |
| 9  | <i>A. fumigatus</i> A | KFFFACREKYGDIFTFILLGQKTTVYLG VQGNF ILNGKLDVNAEEVYSPLTTPVFGSDVVYDCPN SKLMEQKKFIKYG  | 138 |
| 10 | <i>A. fumigatus</i> B | KFFFDCRAKYGDIFTFILLGKTTVYLGTKGNDF ILNGKLRDVCAEEVYSPLTTPVFGRHVVYDCPN AKLMEQKKFVKYG  | 153 |
| 11 |                       | ::* * : ****:*:*:*:**: ***** :*:*:*:*:* ** * * * * * * * * * * * * * * * * *       |     |
| 12 |                       |                                                                                    |     |
| 13 | <i>S. cerevisiae</i>  | LTKEAFKSYVPLIAEEVYKYFRDSKNFRLNERTTGTIDVMVTQPEMTIFTASRSLLGKEMRAKLDTFAYLYSDLDKGFT    | 237 |
| 14 | <i>C. albicans</i>    | LTTDSFKRYVPKIREEILNYFVTDESFKLKEKTHGVANVMKTQPEITIFTASRSLFGDEMRRIFDRSFAQLYSDLDKGFT   | 229 |
| 15 | <i>A. fumigatus</i> A | LTQSALESHVPLIEKEVLDYLRDSPNFQG---SSGRVDISAAMAEITIFTAARALQGQEVRSKLTAEFADLYHDLDKGFT   | 215 |
| 16 | <i>A. fumigatus</i> B | LTSDALRSYVPLITDEVESFVKNSPAFQG---HKG VFDVCKTIAEITITYTASRSLQGKEVRSKFDSTFAELYHNLDMGFA | 230 |
| 17 |                       | ** .:.. : ** * .*: .. . * : * : : .*:**:*:*:* * *.*:* : ** * * : ** * * :          |     |
| 18 |                       |                                                                                    |     |
| 19 | <i>S. cerevisiae</i>  | PINFVFPNLPLEHYRKRDRHAQKAISGTYMSLIKERRKNNDIQD--RDLIDSL-MKNSTYKDGVKMTDQEIANLLIGVLMG  | 314 |
| 20 | <i>C. albicans</i>    | PINFVFPNLP LPHYWRRDAAQKKISATYMEIKSRRERGDIDPN-RDLIDSLLI-HSTYKDGVKMTDQEIANLLIGILMG   | 307 |
| 21 | <i>A. fumigatus</i> A | PINFMLPWAPLPHNKRDAAHARMRSIYVDIITQRRLDGEKDSQKSDMIWNL-M-NCTYKNGQQVPDKEIAHMMITLLMA    | 293 |
| 22 | <i>A. fumigatus</i> B | PINFMLPWAPLPHNRKRDAARQLTETEMEIKARRQAGSKKDS-EDMVWNL-M-SCVYKNGTPVPDEEIAHMMIALLMA     | 307 |
| 23 |                       | ****:* * * * : ** * : : * : . * . ** .. . * : : * : ..**:* : .*:**:*:* * * * * *   |     |
| 24 |                       |                                                                                    |     |
| 25 | <i>S. cerevisiae</i>  | GQHTSAAISAWILLHLAERP DVQQELYEEQMRVLD----GGK KELTYDLLQEMPLLNTIKETLRMHHP LHSIFRKVMK  | 389 |
| 26 | <i>C. albicans</i>    | GQHTSASTSAWFLHLGKPHLQDVYQEVEVLLKEKG--GDLNDLTYEDLQKLPSVNNTIKETLRMHMPLHSIFRKVTN      | 385 |
| 27 | <i>A. fumigatus</i> A | GQHSSSSISAWIMLRLASQPKVLEELYQEQLANLGPAGPDGSLPPLQYKDLDKLPFHQHVIRETLRIHSSIHSIMRKVKS   | 373 |
| 28 | <i>A. fumigatus</i> B | GQHSSSSISAWIVLRLATRPDIMEELYQEQIRVLG----SDLPPLTYDNLQKLDLHAKVIKETLRLHAPIHSIIRAVKN    | 382 |
| 29 |                       | ****:* : *:*:*:* * .*: : : *:* * : * .. * * .*::: : .*:**:*:* * .*:**:* * *        |     |
| 30 |                       |                                                                                    |     |
| 31 | <i>S. cerevisiae</i>  | DMHVPNTSYVIPAGYHVLVSPGYTHLRDEYFPAHQFNIHRWNNDSSASS---YSVGEEDVDYGF GAI SKGVSSPYLPFGG | 465 |
| 32 | <i>C. albicans</i>    | PLRIPETNYIVPKGHYVLVSPGYAHTSERYFDNPEDFDPTRWDTAAKANSVSNSSDEVDYGF GKVSKGVSSPYLPFGG    | 465 |
| 33 | <i>A. fumigatus</i> A | PLPVPGTPYMI PPGRVLLASPGVTALSDEHFPNAGCWDPHRWENQATKE---QENDKVV DYG YGAVSKGTSSPYLPFGA | 449 |
| 34 | <i>A. fumigatus</i> B | PMAVDGTSYVIPTSHNVLSSPGVTARSEEHPNPLEWNP HRWDENIAAS---AEDDEKVDYGYGLVSKGTNSPYLPFGA    | 458 |
| 35 |                       | : : * *:* * . : * ** * : : : * * . : : ** : : . . ****:* : ** .*****.              |     |
| 36 |                       |                                                                                    |     |
| 37 | <i>S. cerevisiae</i>  | GRHRCIGEHFAYCQLGVLMSIFIRTLKWHYPEGKT-VPPP DFTSMVTLPTGPAKIIWEKRNPEQKI                | 530 |
| 38 | <i>C. albicans</i>    | GRHRCIGEQFAYVQLGTILTFVYNLRWTI-DGYK-VPDPDYSSMVVLPTEPAEIIWEKRETCMF-                  | 528 |
| 39 | <i>A. fumigatus</i> A | GRHRCIGEFAYVNLGTVILATIVRHLRFRNVDGKKGVPETDYSSLSFGPMKPSIIGWEKRSKNTSK                 | 515 |
| 40 | <i>A. fumigatus</i> B | GRHRCIGEQFAYLQLGTITAVLVRFRNLPGV DGIPTDYSSLSFKPLGRSFVEFEKRESATKA                    | 524 |
| 41 |                       | *****:* ** : * : : : : * : * .*:**:* * : : * * *                                   |     |

42 **Figure S1** Sequence alignment of *S. cerevisiae* CYP51 (Uniprot: A6ZSR0), *C. albicans*  
43 CYP51 (Uniprot: P10613) and *A. fumigatus* CYP51A (Uniprot: Q4WNT5) and B (Uniprot:  
44 Q96W81). The alignment was carried out using the T-coffee server (Espresso) using pdb 4k0f as a  
45 reference (1). The conserved tyrosine Y140 is highlighted in yellow while G310, T322 and G464 are  
46 highlighted in red (*S. cerevisiae* numbering).  
47

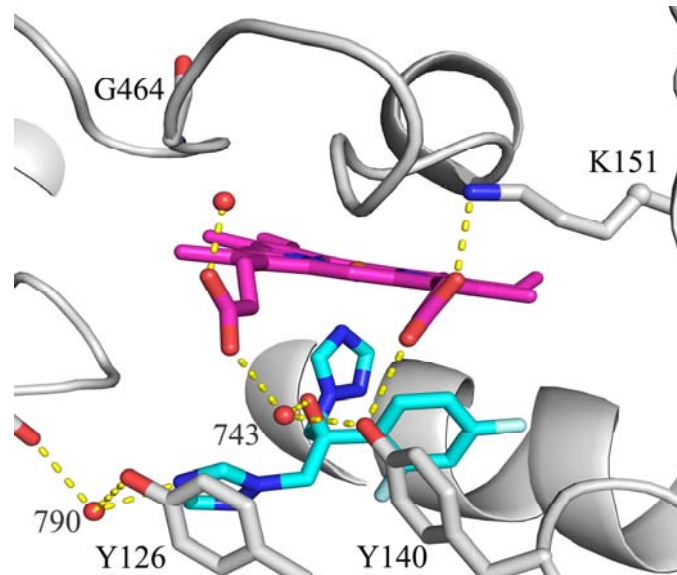

48  
49  
50 **Figure S2** Sites of mutation in *C. albicans* and *A. fumigatus* CYP51 (residues G464 and K151  
51 in ScErg11p). The main chain is indicated as a grey ribbon and fluconazole is indicated as  
52 sticks (C atoms cyan, N atoms blue, O atoms red and F atoms pale blue). The heme cofactor is  
53 also shown as sticks (magenta C atoms). Hydrogen bonds between the water molecule at G464  
54 and the heme propionate as well as K151 and the second heme propionate are shown (yellow  
55 dashed lines). Hydrogen bonding is also shown between HOH743, FLC, heme and Y140, as  
56 well as between HOH790, FLC, and S382.

57  
58

59 **Table S1.** Data collection and refinement statistics.

|                                        |                                |
|----------------------------------------|--------------------------------|
| PDB code                               | 4WMZ                           |
| Space group                            | P 1 2 <sub>1</sub> 1           |
| Resolution range (Å)                   | 37.84 - 2.05 (2.11 - 2.05)     |
| Unit cell axes (Å)                     | a = 77.24, b = 65.21 c = 81.02 |
| Diffraction source                     | Australian Synchrotron MX1     |
| Wavelength (Å)                         | 0.954                          |
| Total reflections                      | 293689                         |
| Unique reflections                     | 47935                          |
| Average redundancy                     | 6.1 (5.3)                      |
| Completeness (%)                       | 95.6 (84.6)                    |
| <I/σ(I)>                               | 12.4 (1.4)                     |
| Wilson B-factor                        | 33.4                           |
| R <sub>merge</sub> <sup>†</sup>        | 0.083 (0.953)                  |
| CC(1/2)                                | 0.998 (0.634)                  |
| Refinement                             |                                |
| R <sub>cryst</sub> <sup>‡</sup>        | 0.20 (0.30)                    |
| R <sub>free</sub> <sup>§</sup>         | 0.23 (0.32)                    |
| Number of reflections                  | 47899 (2351)                   |
| Number of atoms in model               |                                |
| Protein                                | 4304                           |
| Ligand                                 | 22                             |
| Water molecules                        | 155                            |
| Deviation from ideal bond lengths* (Å) | 0.008                          |
| Deviation from ideal bond angles* (°)  | 1.1                            |
| Ramachandran analysis (%)              |                                |
| Preferred                              | 96.5                           |
| Allowed                                | 3.2                            |
| Residues in disallowed regions         | 0.2                            |

60

61 <sup>†</sup> R<sub>merge</sub> =  $\sum_{hkl} \sum_i |I_i(hkl) - [I(hkl)]| / \sum_{hkl} \sum_i I_i(hkl)$ .

62 ‡  $R_{\text{cryst}} = \frac{\sum_{\text{hkl}} |F_{\text{obs}} - F_{\text{calc}}|}{\sum_{\text{hkl}} |F_{\text{obs}}|}$  computed over a working set composed of 95% of data.

63 §  $R_{\text{free}} = \frac{\sum_{\text{hkl}} |F_{\text{obs}}| - |F_{\text{calc}}|}{\sum_{\text{hkl}} |F_{\text{obs}}|}$  computed over a test set composed of 5% of data.

64 \*The parameters for ideal values for bond lengths and bond angles used were defined by  
65 Engh and Huber (2). The validation statistics were obtained from Aimless (3) and Phenix (4).

66

## 67 **Table S2:**

68 CSD codes used for Fe-N and Fe-S distances respectively.

69 Fe-N

70 ABIVOX, ABIWAK, ABIWEO, AFADAN, BANTIV, COQHUM, COQJEY, DUPLOP,  
71 EVINAZ, EVINED, EVINIH, EVINON, FENBAB, HEPREA, HERDOY, IXIDUO,  
72 IXIFAU, JAQVOM, JAQWAZ, JEHVAU, JITSUB, KABWAN, KABWER, NEZXOG,  
73 PAVDIA, PAVDOG, PAVDOG01, PAVDUM, POLNUA, QEHFIT, QIYROG, QUISAT,  
74 QOFMUU, SAJFAL, SAJFAL01, TESLUY, TESMAF, TETWUK, , UCIVEH, UCIVIL,  
75 WOQCOV, WOQCUB, WOQCUB01, WOQDIQ, WOQDOW, YIVSEB, DEDLAB,  
76 DEDMEG,

77 Fe-S; KULWOD, PIMVFE01, SAXTEQ, YEHDAR

78

79

## 80 **References**

- 81 1. **Armougom F, Moretti S, Poirot O, Audic S, Dumas P, Schaeli B, Keduas V,**  
82 **Notredame C.** 2006. Espresso: automatic incorporation of structural information in  
83 multiple sequence alignments using 3D-Coffee. *Nucleic Acids Res* **34**:W604-608.  
84 2. **Engh RA, Huber R.** 1991. Accurate Bond and Angle Parameters for X-Ray Protein-  
85 Structure Refinement. *Acta Crystallographica Section A* **47**:392-400.  
86 3. **Evans P.** 2006. Scaling and assessment of data quality. *Acta Crystallogr D Biol*  
87 *Crystallogr* **62**:72-82.  
88 4. **Chen VB, Arendall WB, Headd JJ, Keedy DA, Immormino RM, Kapral GJ,**  
89 **Murray LW, Richardson JS, Richardson DC.** 2010. MolProbity: all-atom structure  
90 validation for macromolecular crystallography. *Acta Crystallographica Section D-*  
91 *Biological Crystallography* **66**:12-21.

92

93
